# Supplementary material for: A Histamine-Free Diet Is Helpful for Treatment of Adult Patients with Chronic Spontaneous Urticaria
Source: PubMed Central journal article supplement — Ann Dermatol. 2018 Feb 21;30(2):164–72. doi: 10.5021/ad.2018.30.2.164 (PMC5839887; doi:10.5021/ad.2018.30.2.164), 2018-02-21
Supplement: ad-30-164-s001.pdf [file ad-30-164-s001.pdf]

**Supplementary Table 1.** The food ranking of histamine level studied by our previous study

Name:                      Regeister number:                      Gender:                      Age:  
 \*Histamine is one of the causes of urticaria. Below is schematic table showing the histamine level of each food. You are advised to avoid foods with high histamine level which is in the upper side of the column.

|              |                                                | Histamine level of food |                                 |            |                                   |                                    |                |               |
|--------------|------------------------------------------------|-------------------------|---------------------------------|------------|-----------------------------------|------------------------------------|----------------|---------------|
|              |                                                | Fishery products        | Meat products                   | Eggs       | Fermented food                    | Vegetables                         | Dairy products | Etc.          |
| Higher level | Grilled anchovy<br>Grilled pacific saury       |                         | Pork<br>Grilled sausage and ham |            | Red pepper paste<br>Soybean paste | Spinach<br>Fermented radish kimchi |                |               |
|              | Grilled mackerel                               |                         | Chicken                         |            |                                   | Fermented cabbage kimchi           | Cheese         | Toasted laver |
|              | Grilled hairtail                               |                         | Raw sausage and ham             |            |                                   |                                    |                |               |
|              | Can of tuna<br>Boiled ahcnovy<br>Boiled shrimp |                         |                                 |            |                                   |                                    |                |               |
| 50 ng/g      | Dried anchovy<br>Boiled pacific saury          |                         |                                 |            |                                   |                                    |                | Raw laver     |
|              | Grilled Spanish mackerel                       |                         |                                 |            |                                   |                                    |                |               |
|              | Boiled hairtail                                |                         | Grilled beef                    |            |                                   |                                    |                |               |
|              | Squid                                          |                         | Boiled beef                     |            |                                   |                                    |                |               |
|              | Boiled mackerel                                |                         | Raw beef                        | Boiled egg |                                   | Carrot                             | Milk           |               |
|              | Boiled Spanish mackerel                        |                         |                                 | Raw egg    |                                   | Onion                              |                |               |
| Lower level  |                                                |                         |                                 |            |                                   | Raw cabbage and radish             |                |               |

Be aware that fermented foods (ex. Soybean paste, red pepper paste, kimchi, yogurt, cheese) contain high level of histamine, and please avoid them.

Also, fast foods, tomato, nuts including peanut, alcohols including wine, green tea, chocolate, grape, banana, strawberry, citrus fruits such as lemon and orange should be restricted.
